# Supplementary material for: Identification of Body Behaviors and Facial Expressions Associated with Induced Orthopedic Pain in Four Equine Pain Scales
Source: MDPI journal article supplement (doi:10.3390/ani10112155), 2020-11-19
Supplement: s1 [file s1]

**Table S1.** Mean ( $\pm$  SD) scores for each scale item before and after lameness induction. Pain assessments performed up to each horse reached the maximum total asymmetry score are included. Number of pain assessments (n) are stated in the table. Scores from all observers are included. SD = standard deviation of the mean.

| Scale                                                                           | Scale item                                      | Before<br>induction<br>(n = 16) |             | After<br>induction<br>(n = 39) |             |
|---------------------------------------------------------------------------------|-------------------------------------------------|---------------------------------|-------------|--------------------------------|-------------|
|                                                                                 |                                                 | Mean                            | ( $\pm$ SD) | Mean                           | ( $\pm$ SD) |
| <b>Horse Grimace Scale (HGS)</b>                                                | Stiffly backward ears                           | 0.063                           | 0.245       | 0.197                          | 0.459       |
|                                                                                 | Orbital tightening                              | 0.000                           | 0.000       | 0.051                          | 0.222       |
|                                                                                 | Tension above the eye area                      | 0.625                           | 0.489       | 0.829                          | 0.400       |
|                                                                                 | Prominent strained chewing muscles              | 0.000                           | 0.000       | 0.051                          | 0.258       |
|                                                                                 | Mouth strained and pronounced chin              | 0.021                           | 0.144       | 0.034                          | 0.182       |
|                                                                                 | Strained nostrils and flattening of the profile | 0.083                           | 0.279       | 0.308                          | 0.516       |
| <b>Equine Utrecht University Scale of Facial Assessment of Pain (EQUUS-FAP)</b> | Head                                            | 0.000                           | 0.000       | 0.103                          | 0.305       |
|                                                                                 | Eyelids                                         | 0.063                           | 0.245       | 0.077                          | 0.268       |
|                                                                                 | Focus                                           | 0.000                           | 0.000       | 0.128                          | 0.336       |
|                                                                                 | Nostrils                                        | 0.292                           | 0.459       | 0.350                          | 0.497       |
|                                                                                 | Corners mouth/lips                              | 0.042                           | 0.202       | 0.060                          | 0.272       |
|                                                                                 | Muscle tone head                                | 0.021                           | 0.144       | 0.009                          | 0.092       |
|                                                                                 | Flehmen and/or yawning                          | 0.000                           | 0.000       | 0.120                          | 0.476       |
|                                                                                 | Teeth grinding and/or moaning                   | 0.021                           | 0.144       | 0.017                          | 0.185       |
|                                                                                 | Ears                                            | 0.021                           | 0.144       | 0.060                          | 0.238       |
| <b>Equine Pain Scale (EPS)</b>                                                  | Pain face                                       | 0.167                           | 0.559       | 0.658                          | 0.957       |
|                                                                                 | Gross pain behaviour                            | 0.000                           | 0.000       | 0.103                          | 0.423       |
|                                                                                 | Activity (act)                                  | 0.500                           | 1.011       | 0.282                          | 0.641       |
|                                                                                 | Location in the stall                           | 0.125                           | 0.393       | 0.239                          | 0.448       |
|                                                                                 | Posture/weight bearing                          | 0.000                           | 0.000       | 0.444                          | 0.875       |
|                                                                                 | Head position                                   | 0.042                           | 0.202       | 0.094                          | 0.347       |
|                                                                                 | Attention towards painful area                  | 0.000                           | 0.000       | 0.000                          | 0.000       |
|                                                                                 | Interactive behaviour                           | 0.125                           | 0.393       | 0.111                          | 0.316       |
|                                                                                 | Response to food                                | 0.083                           | 0.279       | 0.128                          | 0.406       |
| <b>Composite Pain Scale (CPS)</b>                                               | Kicking abdomen                                 | 0.000                           | 0.000       | 0.009                          | 0.092       |
|                                                                                 | Pawing on the floor                             | 0.000                           | 0.000       | 0.077                          | 0.298       |
|                                                                                 | Head movement                                   | 0.000                           | 0.000       | 0.051                          | 0.222       |
|                                                                                 | Appearance                                      | 0.083                           | 0.404       | 0.265                          | 0.515       |
|                                                                                 | Posture                                         | 0.021                           | 0.144       | 0.299                          | 0.591       |
|                                                                                 | Appetite                                        | 0.104                           | 0.309       | 0.179                          | 0.466       |
|                                                                                 | Sweating                                        | 0.104                           | 0.425       | 0.137                          | 0.369       |
|                                                                                 | Interactive behaviour                           | 0.000                           | 0.000       | 0.009                          | 0.092       |
|                                                                                 | Response to palpation of painful area           | 0.000                           | 0.000       | 0.111                          | 0.316       |
|                                                                                 | Respiratory rate                                | 0.042                           | 0.202       | 0.188                          | 0.507       |
|                                                                                 | Heart rate                                      | 0.000                           | 0.000       | 0.043                          | 0.203       |
|                                                                                 | Rectal temperature                              | 0.000                           | 0.000       | 0.043                          | 0.203       |
|                                                                                 | Digestive sounds                                | 0.000                           | 0.000       | 0.026                          | 0.159       |
